# Supplementary material
Source: Research Square preprint supplement (doi:10.21203/rs.3.rs-9091394/v1)
Supplement: Supplementary file 1 [file b6925dcd809eef41bde5046b.xlsx]

## Sheet: Sheet1
	Primer名称	序列(5' to 3')
1	qh-CHOP-190F	CCTCCTGGAAATGAAGAGGAAGA
2	qh-CHOP-190R	TCCTGGTTCTCCCTTGGTCT
3	qh-XBP1-101F	CCCTCCAGAACATCTCCCCAT
4	qh-XBP1-101R	ACATGACTGGGTCCAAGTTGT
5	qh-HSPA5-218F	CTTGCCGTTCAAGGTGGTTG	HSPA5 alias GRP78
6	qh-HSPA5-218R	TCTTTGGTTGCTTGGCGTTG
7	qh-HSPA6-160F	CGTGCCCGCCTATTTCAATG
8	qh-HSPA6-160R	AAAAATGAGCACGTTGCGCT
9	hq-HSPA1A-123F	ACATCAGCCAGAACAAGCGA
10	hq-HSPA1A-123R	AGTCGATGCCCTCAAACAGG
11	qhPK2-FW	GTGACAAGGACTCCCAATGTG
12	qhPK2-RV	TGACCCAGATACTGACAGCAC
